# Supplementary material
Source: Springer Nature journal article supplement (https://www.springermedizin.de/resource/supplementary/12906_2011_489_MOESM1_ESM.pdf/9519586)

How many of the past 7 days did you...

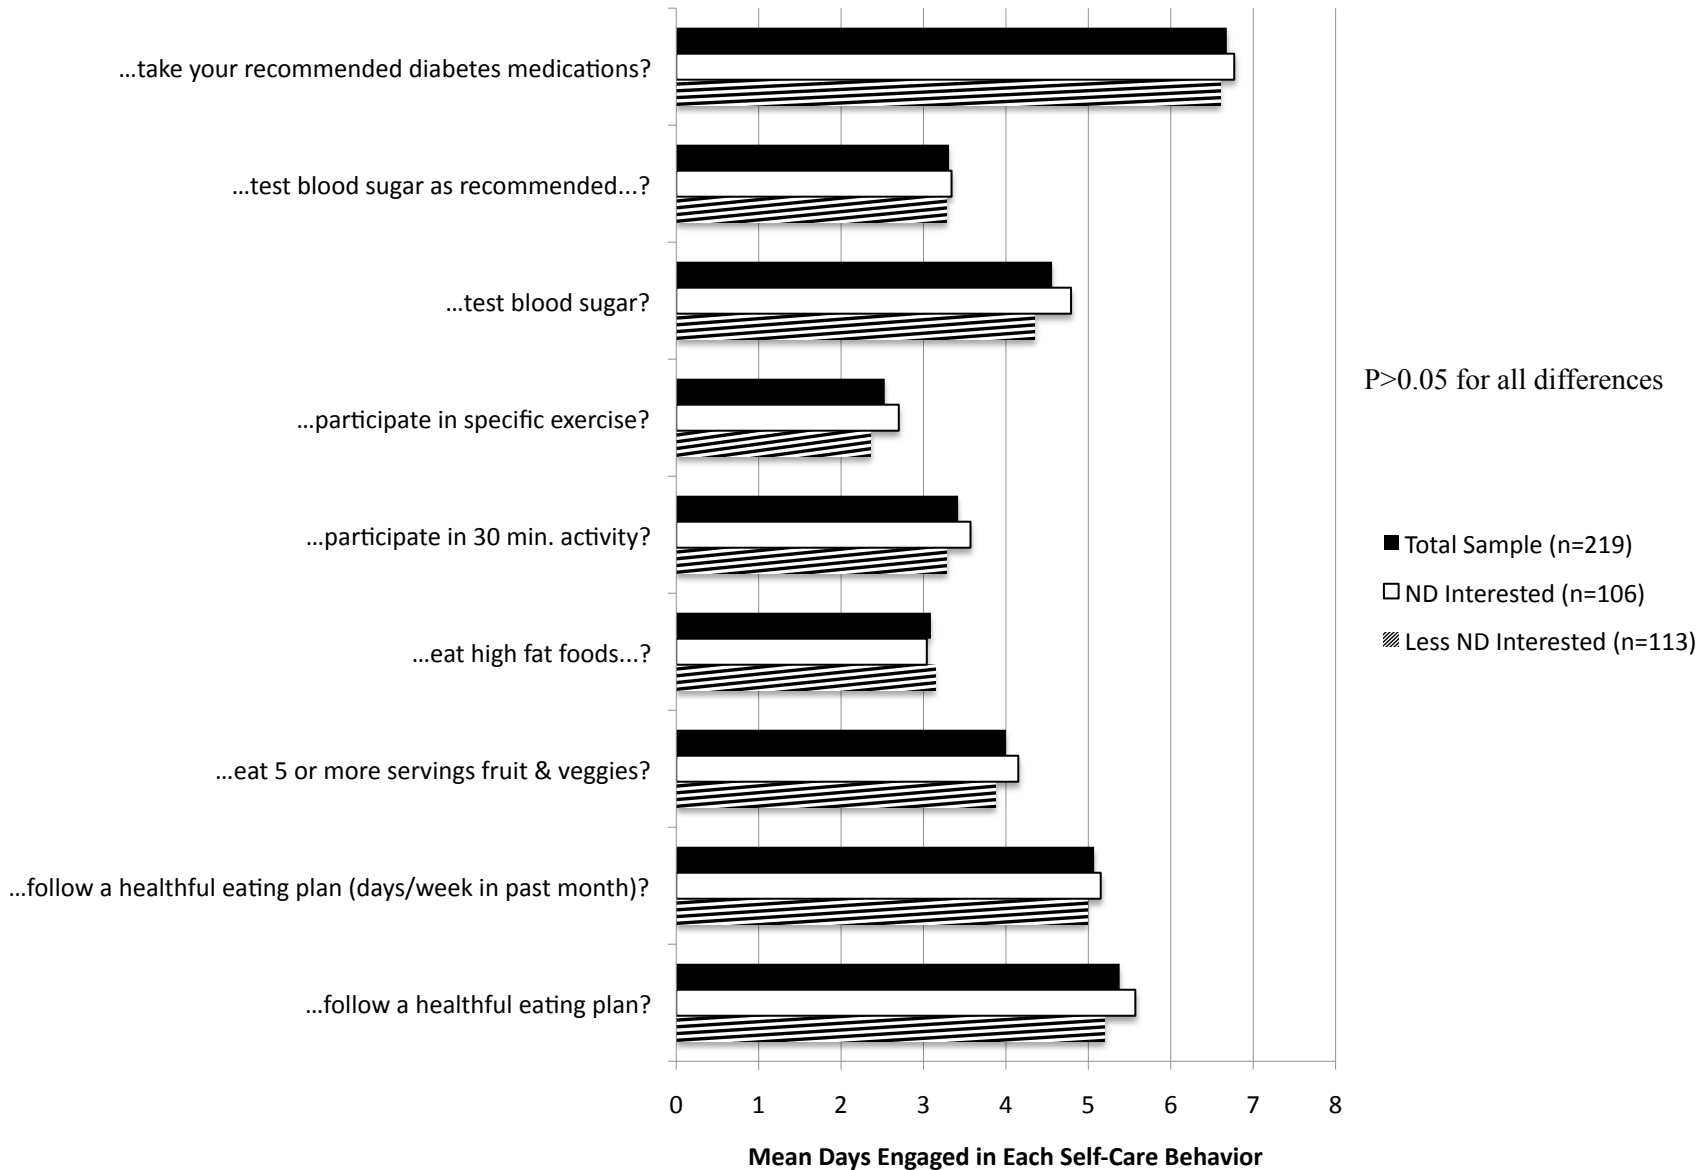

Supplement: MOESM1 [file 9519586]
